# Supplementary material
Source: PubMed Central journal article supplement (PMC7963687)
Supplement: 17-00032.pdf [file 17-00032.pdf]

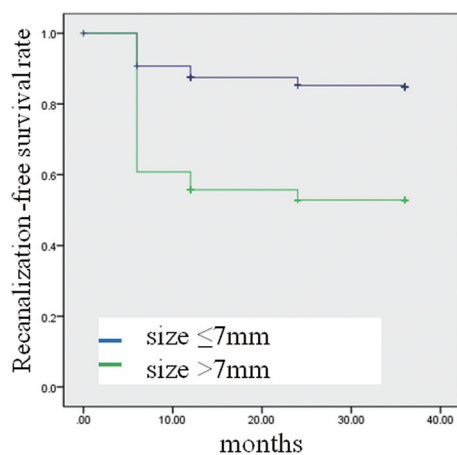

**ON-LINE FIG.** Kaplan-Meier 36-month estimates of cumulative survival (without recanalization) in coiled aneurysms according to aneurysm size. The cumulative survival rate at 6 months was 90.7% in aneurysms  $\leq 7$  mm and 60.8% in aneurysms  $> 7$  mm. At 30 months after the procedure, the cumulative survival rate was 84.8% in aneurysms  $\leq 7$  mm and 52.8% in aneurysms  $> 7$  mm. Compared with small aneurysms  $\leq 7$  mm, large aneurysms  $> 7$  mm were more prone to early recanalization than late recanalization. (ie, compared with larger aneurysms  $> 7$  mm, aneurysms  $\leq 7$  mm were more susceptible to late recanalization [versus early recanalization], though long-term complete occlusion after coiling was more likely in aneurysms  $\leq 7$  mm.)

**On-line Table: Multinomial logistic regression; late recanalization versus complete occlusion (early recanalization serving as reference)**

| Variables               | Late Recanalization |                      | Complete Occlusion  |                      |
|-------------------------|---------------------|----------------------|---------------------|----------------------|
|                         | Odds Ratio (95% CI) | P Value <sup>a</sup> | Odds Ratio (95% CI) | P Value <sup>a</sup> |
| Posterior circulation   | 0.54 (0.17–1.70)    | .290                 | 0.43 (0.22–0.81)    | .010                 |
| SAH presentation        | 1.10 (0.50–2.43)    | .819                 | 0.52 (0.31–0.89)    | .016                 |
| Second attempt          | 0.63 (0.23–1.68)    | .351                 | 0.15 (0.08–0.28)    | <.001                |
| Stent                   | 0.52 (0.21–1.29)    | .156                 | 1.42 (0.86–2.35)    | .177                 |
| Antiplatelet medication | 1.16 (0.58–2.31)    | .684                 | 0.73 (0.47–1.15)    | .172                 |
| Aneurysm size           |                     |                      |                     |                      |
| $\leq 4$ mm             | 2.02 (0.76–5.35)    | .156                 | 7.12 (4.00–12.67)   | <.001                |
| $> 4$ to 7 mm           | 3.00 (1.33–6.74)    | .008                 | 5.43 (3.29–8.97)    | <.001                |
| $> 7$ mm                | 1                   |                      | 1                   |                      |

<sup>a</sup> P < .05 is significant.

Reference category: early recanalization.

Nagelkerke  $R^2 = 0.220$ .
